# Supplementary material for: Somatic mosaicism in schizophrenia brains reveals prenatal mutational processes
Source: PubMed Central journal article supplement (PMC11490355; doi:10.1126/science.adq1456), 2024-10-10
Supplement: NIHMS2029380-supplement-1.pdf [file NIHMS2029380-supplement-1.pdf]

824

825 **Supplementary Text**

826 Somatic copy number gain in SCZ sample

827 Somatic CNV (sCNV) calling of our samples revealed a somatic gain in one SCZ case and none  
828 in the control samples. We applied CNVpytor (52), a method developed to specifically identify  
829 sCNVs from high coverage WGS data (see Methods). With this approach we observed one high  
830 confidence ~90Kb somatic gain mapping to chromosome 4 in a SCZ sample (Fig. S2A, B). The

831 somatic gain had an estimated 17.4% mosaic fraction and overlapped intron 1 of the *SORCS2*  
832 gene and possibly exon2 (Fig. S2A, B). We attempted to look for split reads supporting the exact  
833 breakpoints. Given our ~200x coverage we expected ~16 supporting reads, but were not able to  
834 identify them. However, upon closer inspection we found 2 simple repeat regions at both ends of  
835 the estimated breakpoints, hindering mappability at the breakpoint loci, thus it is not surprising  
836 we were not able to find supportive reads. Nevertheless, the shift in phased-allele frequency  
837 provides strong statistical evidence of an event in this region (Fig. S2A). The simple repeat  
838 regions suggest that this sCNV potentially arose through tandem duplication. Thus, we expanded  
839 the range by 10 Kb around the estimated breakpoints to provide less stringent breakpoints (Fig.  
840 S2A).

841 *SORCS2* encodes for a subunit of the sortilin-related VPS10 domain-containing receptor  
842 proteins, which are cell-surface proteins implicated in central nervous system development (67).  
843 Previous GWAS and germline CNV studies have shown that variants in the *SORCS2* locus may  
844 confer risk for attention-deficit hyperactive disorder (ADHD), and bipolar disorder (14, 15).  
845 Similarly, germline SNPs in intron 1 of *SORCS2* have been associated with clinical outcomes in  
846 ADHD (68), suggesting a potential role in neuropsychiatric disease. Our somatic gain overlaps  
847 regions H3K27ac marks present in brain frontal cortex (Fig. S2B), suggesting a potential  
848 dysregulation of the expression of this gene by altering enhancer interactions. If the breakpoints  
849 actually disrupt exon2, a frame-shift might result in an aberrant protein. However, whether  
850 somatic gains within intron 1/exon2 of the *SORCS2* gene plays a role in SCZ requires further  
851 functional studies.

852

853

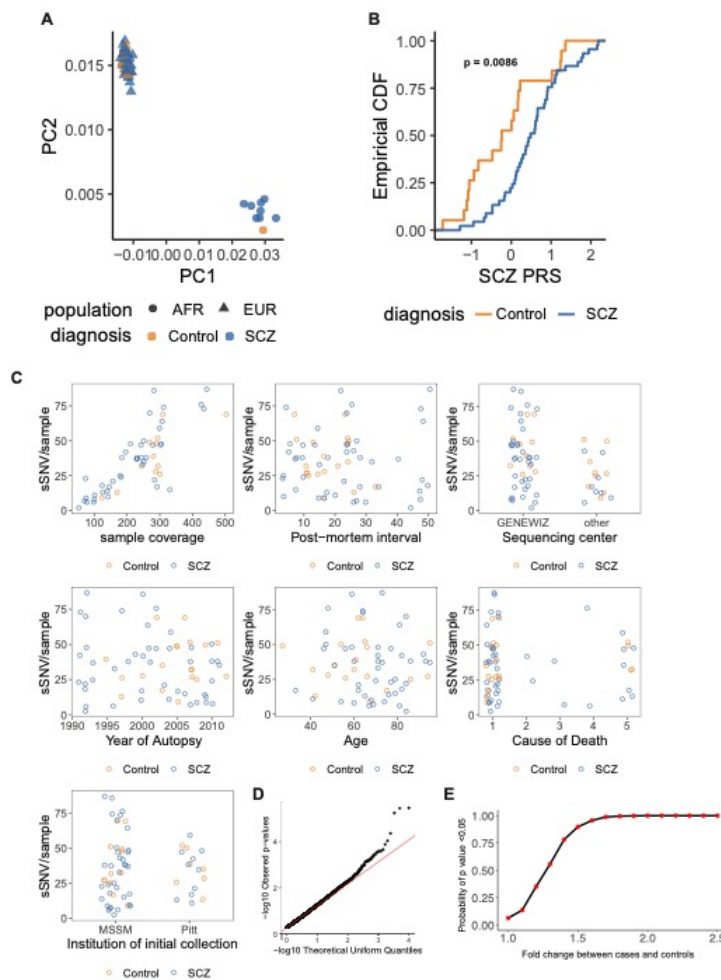

854

855 **Fig. S1. Population stratification, polygenic risk scores in schizophrenia and control**  
 856 **individuals, and technical covariates effect on somatic variants.** A) Scatter plot of calculated  
 857 principal components of genetic ancestry in SCZ cases and controls. Colors indicate diagnosis  
 858 status and shape indicates population ancestry. B) Empirical CDF curves of normalized (mean=  
 859 0; SD =1) polygenic risk scores (PRS) in SCZ cases vs controls colored by diagnosis status. The  
 860 p-value is calculated by two-sided Kolmogorov-Smirnov test. C) Scatter plots across technical  
 861 covariates. For categorical covariates a jitter was used across the x-axis for illustration purposes.  
 862 D) QQ-plot of theoretical uniform distribution and observed null p values of step negative  
 863 binomial regression for the comparison of genome-wide sSNV in cases compared to controls. E)  
 864 Power analysis of permutation analysis. At the fold change observed ( $\leq 1.2X$ ), permutation test  
 865 has <25% chance of detecting significant sSNV enrichment in SCZ.

866

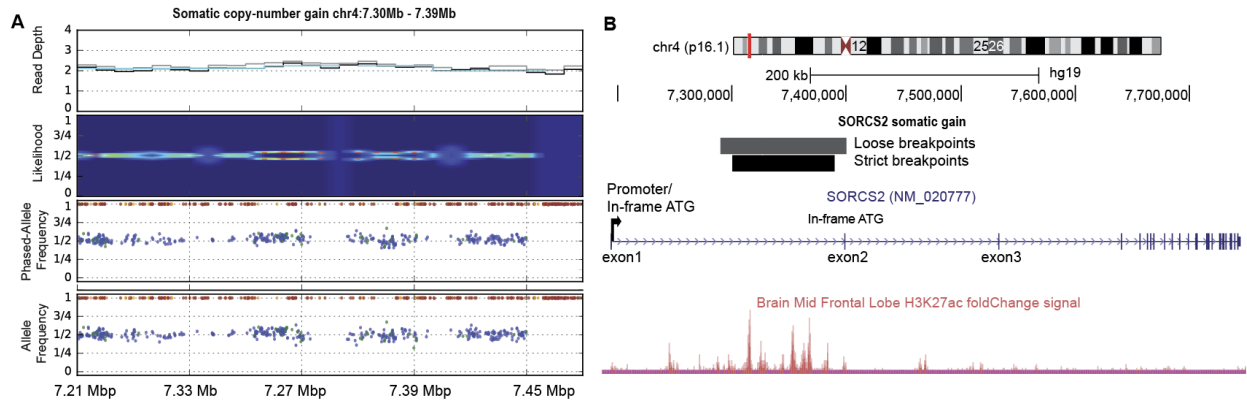

867

868 **Fig. S2. Somatic copy number gain in a SCZ sample** A) Plot of somatic gain. Heatmap  
 869 represents the likelihood function with the red dotted lines indicated the likely event breakpoints.  
 870 The dot plots indicate the phased and un-phased SNP allele-frequency respectively. B) A  
 871 Genome Browser schematic of *SORCS2* gene with H3K27ac histone mark track from Roadmap  
 872 Epigenomics consortium (18).

873

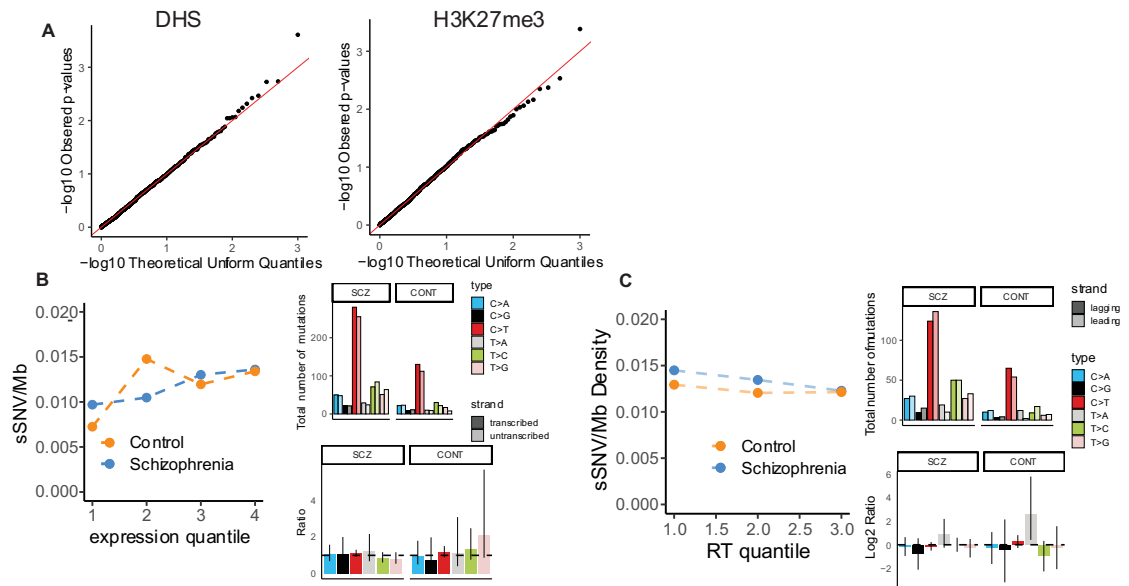

874

875 **Fig. S3. Calibration of epigenomic tests and characterization of transcriptional and**  
 876 **replication strand bias in schizophrenia and controls.** A) Examples of qq-plots of empirical  
 877 null distribution of binomial regression for epigenomic tracks using diagnosis permutation. B)  
 878 Scatter plot of fetal brain gene expression versus sSNV rate in schizophrenia cases and controls  
 879 across expression quartiles. Bar plots showing genome-wide transcriptional strand bias as  
 880 difference in total number of mutations and rate ratio. C) Scatter plot of replication time versus  
 881 sSNV rate in schizophrenia cases and controls across tertiles. Bar plots showing genome-wide  
 882 replication strand bias as difference in total number of mutations and log<sub>2</sub>(rate ratio).

883

884

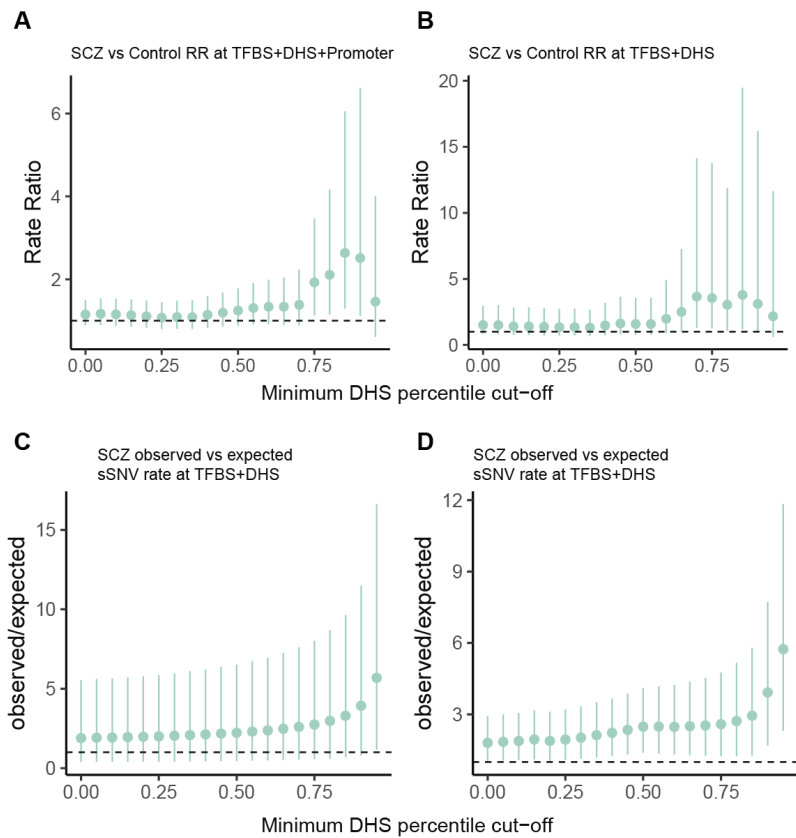

885

886 **Fig. S4. Enrichment of sSNV at TFBS in SCZ neurons across multiple DHS cut-offs.** A, B)  
887 Forest plots of rate ratio comparing the mutational rate in TFBS regions close to promoters (A)  
888 or not restricted to promoters (B) in SCZ vs controls across multiple DHS percentile cut-offs. C,  
889 D) Observed/expected ratio of sSNV at TFBS regions near promoters (C) or not restricted to  
890 promoters (D) in SCZ samples across multiple DHS percentile cut-offs. For all plots the lines  
891 indicate the 95% Poisson confidence interval.

892

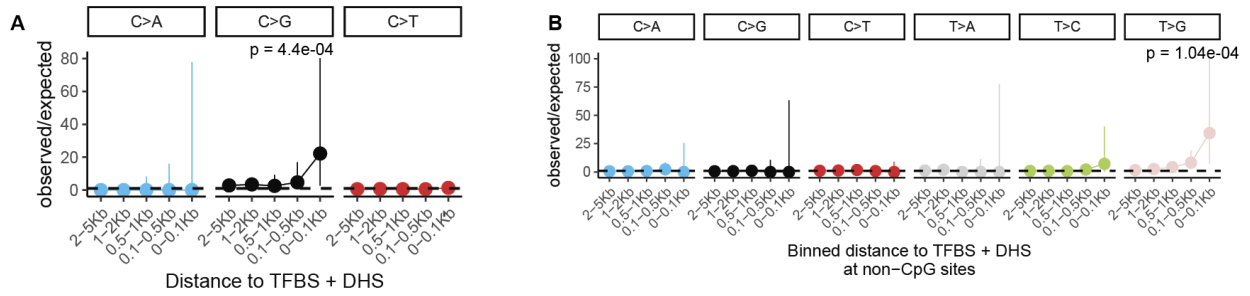

893

894 **Fig. S5. Relative sSNV rate around active TFBS.** A, B) Forest plots of observed vs expected  
 895 ratios in schizophrenia of different base changes in active TFBS at CpG sites and non-CpG sites,  
 896 respectively. For panels A, B, p-values and 95% confidence intervals were computed using a  
 897 Poisson test accounting for trinucleotide context.

898

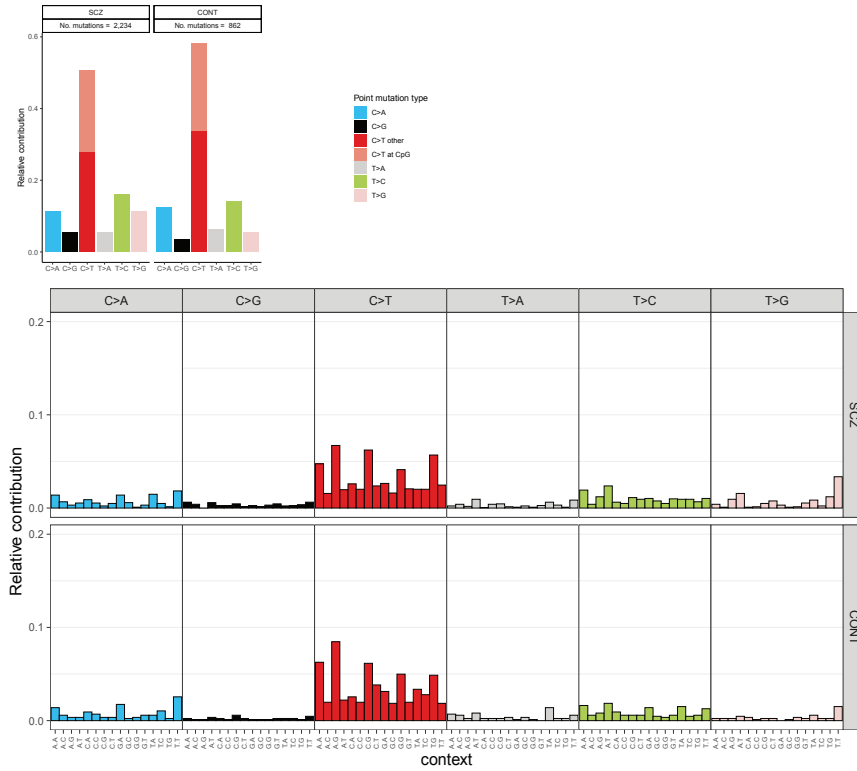

899

900 **Fig. S6. Single base substitution spectrum in schizophrenia and controls.** (Top) Bar plot of  
 901 single base substitution spectrum in schizophrenia case and controls normalized to the total  
 902 number of sSNV in each diagnostic category. (Bottom) Bar plots of the trinucleotide context  
 903 distribution in schizophrenia cases and controls, normalized to the total number of sSNV in each  
 904 diagnostic category. Legend is for both top and bottom.

905

906



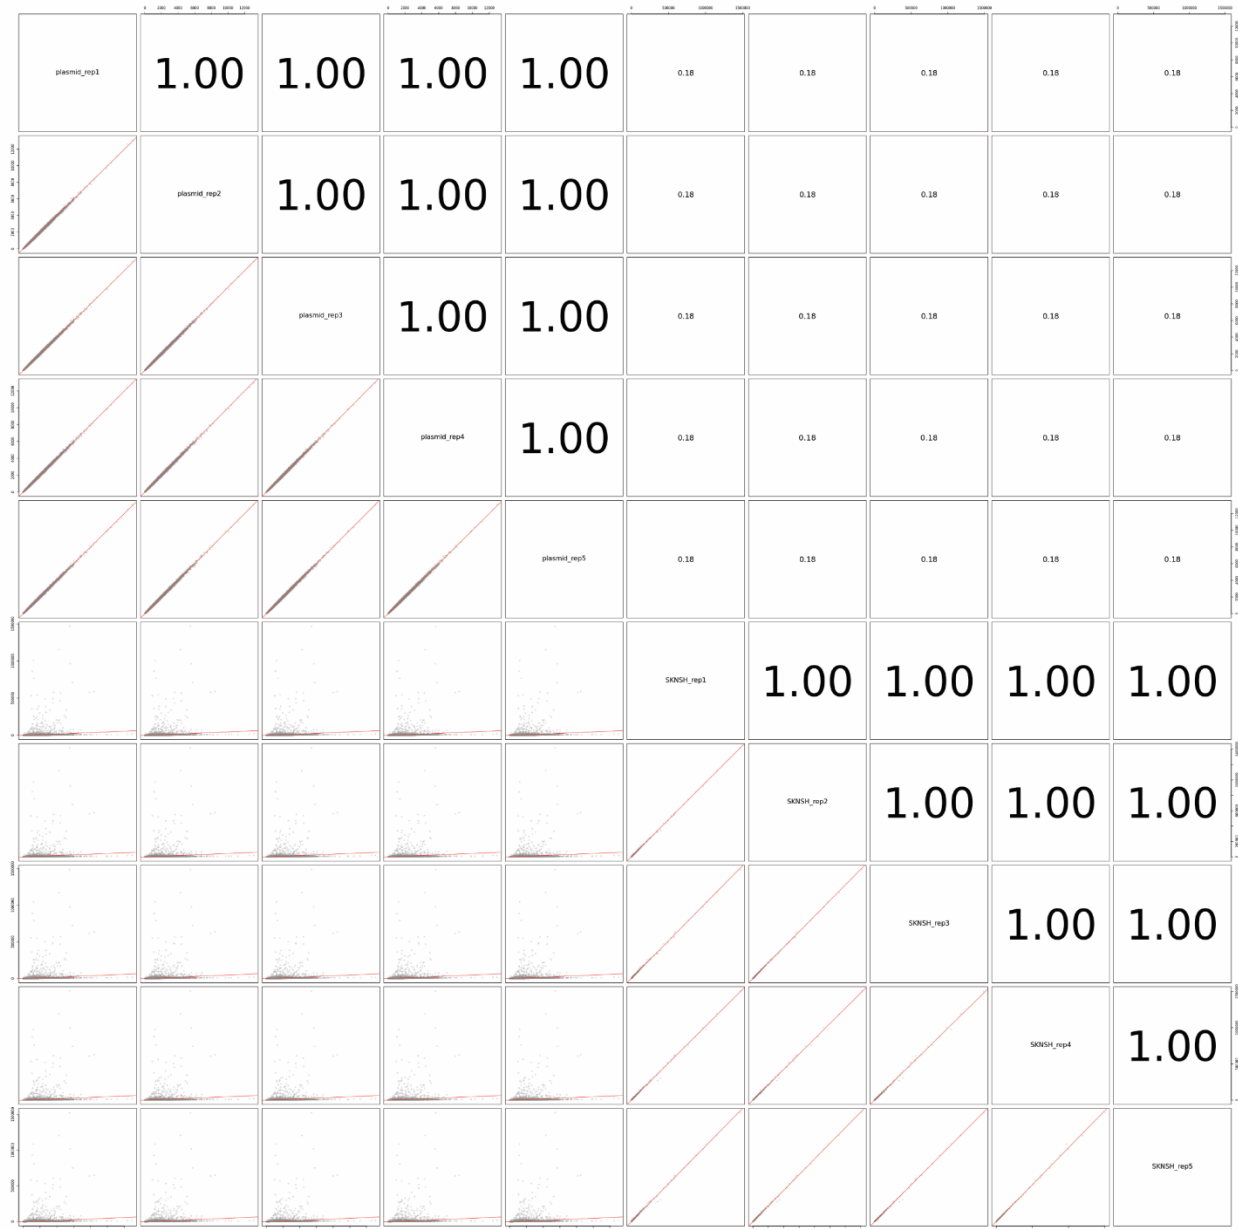

907

908 **Fig. S7. Reproducibility of MPRA assay.** Scatter plot matrix shows high pairwise correlations  
 909 of barcode sequencing read counts between plasmid (n=5) and RNA replicates (n=5) in the  
 910 MPRA experiment. Numbers represent Pearson's r.

**A**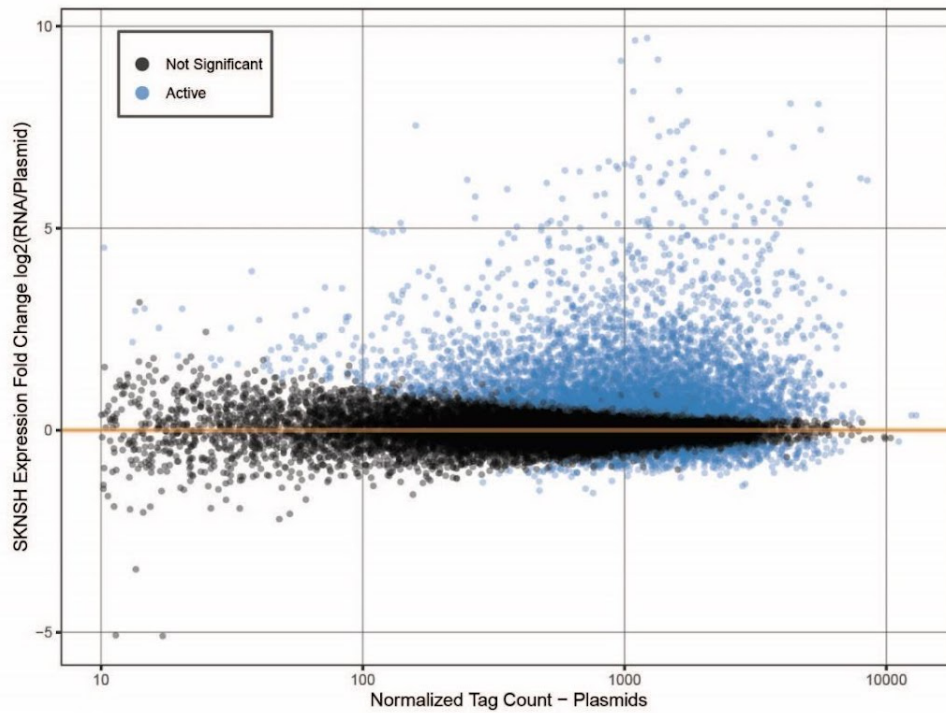**B**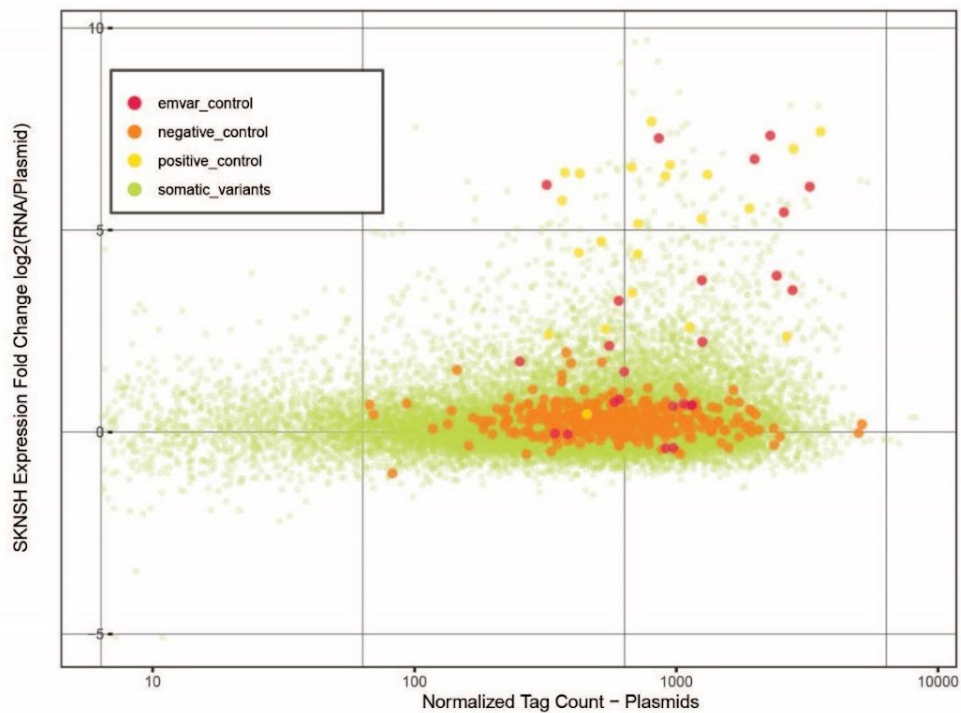

911

912 **Fig. S8. MPRA controls.** (A)  $\log_2$  of RNA/plasmid ratio and normalized plasmid barcode  
913 counts for active oligos (blue). Significance for active oligo is defined at  $\text{FDR} < 0.01$ . (B)  $\log_2$   
914 RNA/plasmid for variants in the MPRA test set (somatic\_variants), negative controls, positive  
915 controls, and emVar controls.

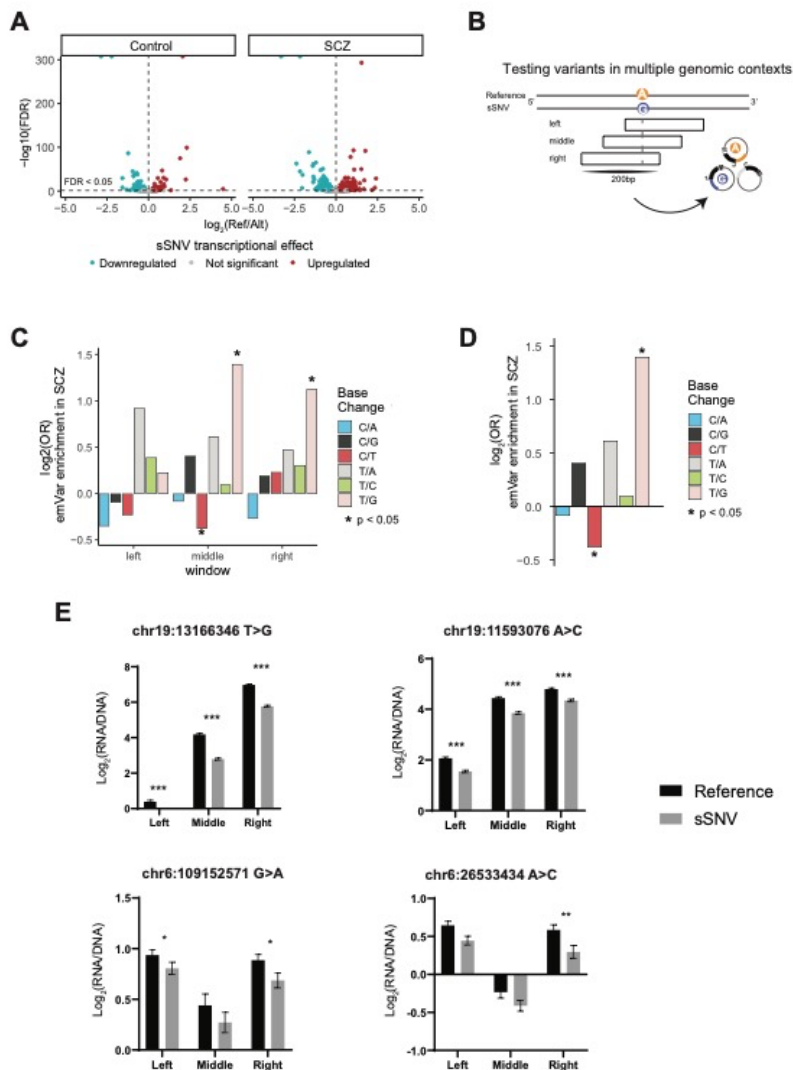

917

918 **Fig. S9. Overview of MPRA results.** A) Volcano plots of effect of sSNV on transcriptional  
 919 activity in SCZ and control samples. X-axis depicts  $\log_2$  of activity ratio between reference and  
 920 somatic allele, with positive values indicating upregulation (red), and negative values indicating  
 921 downregulation (blue). B) Schematic of MPRA testing of variants within different genomic  
 922 contexts. C) Bar plots of enrichment of expression modifying variants (emVars) in SCZ vs  
 923 controls across base changes in different genomic contexts. D) Bar plots of enrichment of  
 924 emVars in SCZ vs. controls across base changes. P-values were computed using permutation-  
 925 based Fisher-Exact tests. E) MPRA activity of somatic variants targeting important  
 926 neurodevelopmental genes and known SCZ risk genes in Fig. 5 demonstrated consistent effect  
 927 across windows.

928

929

930 **Table S1: BSMN member names and affiliations.**

931

932 **Table S2: Subject clinical and demographic data.**

933

934 **Table S3: sSNV mutation call-set, annotated sSNVs, and coding region sSNVs**

935

936 **Table S4: Sample covariates for negative binomial regression.**

937

938 **Table S5: DNase hypersensitivity track descriptions.**

939

940 **Table S6: Nearest-gene annotation table of T>G sSNVs.**

941

942 **Table S7: MPRA primers.**

943

944 **Table S8: MPRA results table.**

945

946 **Table S9: Predicted SCZ emVar targeted genes in human brain tissue.**

947

948
